# Supplementary material for: Estimating HIV-1 Fitness Characteristics from Cross-Sectional Genotype Data
Source: PLOS journal article supplement (doi:10.1371/journal.pcbi.1003886), 2014-11-06
Supplement: S6 (10.1371/journal.pcbi.1003886.s006) [file journal.pcbi.1003886.s006]

Supporting Information:  
Estimating HIV-1 Fitness Characteristics from  
Cross-sectional Genotype Data

Sathej Gopalakrishnan, Hesam Montazeri, Stephan Menz, Niko Beerenwinkel, Wilhelm Huisinga

## Supplementary Figure S6

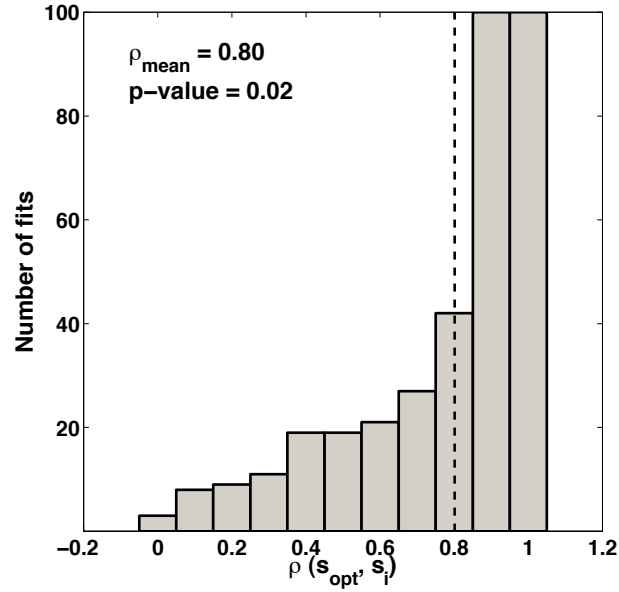

**Cumulative histograms of correlations of fitness costs between fits with varying RFs and the best fit.** A cumulative histogram that shows the rank correlation between fitness costs in the best fit and those estimated by varying RFs in a certain range (refer section D of Supplementary Text S1 for description). The estimated fitness costs show a strong and statistically significant average correlation ( $\rho = 0.80$ ,  $p\text{-value} = 0.02$ ), in spite of the fact that only one round of estimation was performed for each set of RF (in view of computational costs).
